# Supplementary material for: Application of quality-controlled sea level height observation at the central East China Sea: Assessment of sea level rise
Source: Copernicus journal article supplement (doi:10.5194/os-21-2085-2025), 2025-09-24
Supplement: Supplementary file 1 [file os-21-2085-2025-supplement.pdf]

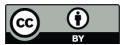

*Supplement of*

**Application of quality-controlled sea level height observation at the central East China Sea: Assessment of sea level rise**

**Taek-Bum Jeong et al.**

*Correspondence to:* Yong Sun Kim (yongskim@kiost.ac.kr) and Jae-Ho Lee (jaeholee@kiost.ac.kr)

The copyright of individual parts of the supplement might differ from the article licence.

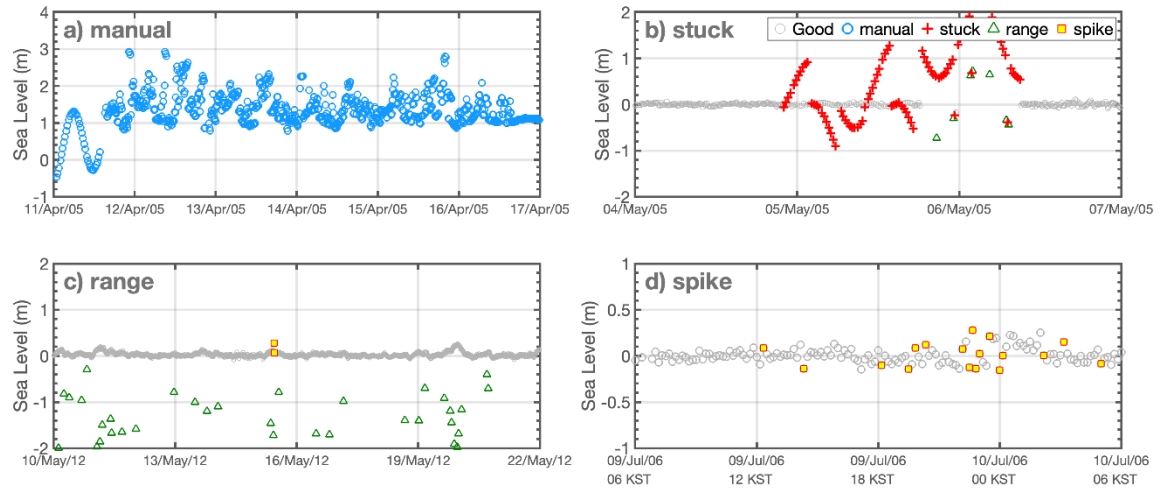

Figure S1. Time series of non-tidal residual values for cases involving about 4 flags. a) manual, b) range, c) spike, and d) stuck. Each marker indicates good data (grey circle), manual (blue circle), range (green triangle), spike (yellow square with red outline), and stuck (red cross), respectively.

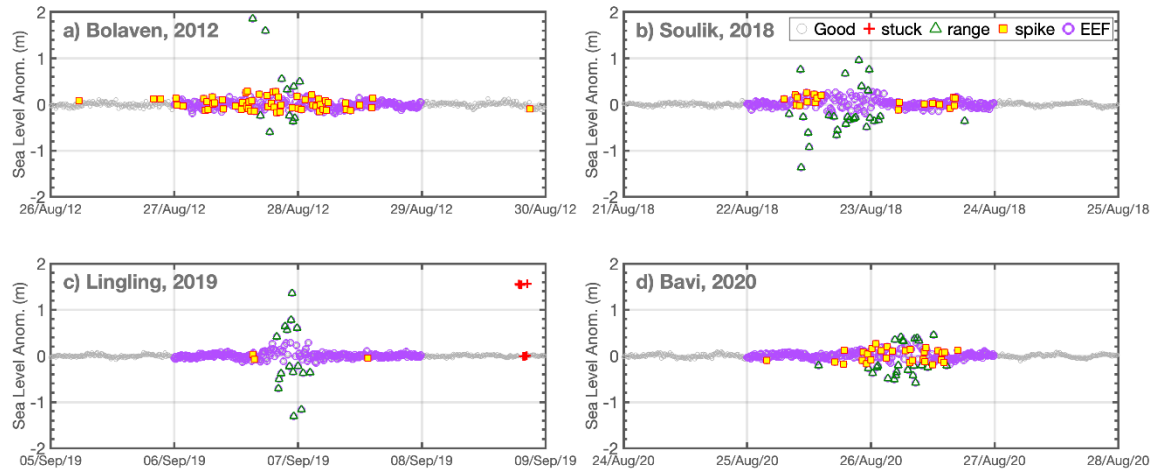

Figure S2. Time series of non-tidal residual values for cases involving about 4 flags. a) manual, b) range, c) spike, and d) stuck. Each marker indicates good data (grey circle), manual (blue circle), range (green triangle), spike (yellow square with red outline), and stuck (red cross), respectively.

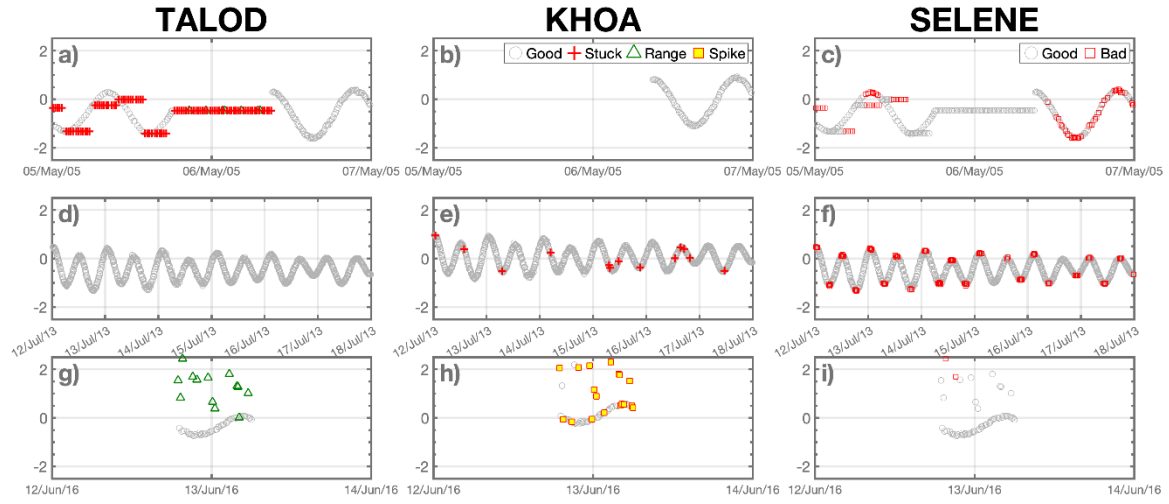

Figure S3. Same as Fig. 5, but for invariant stuck case (a-c, from 05 May 2005 to 07 May 2005), stuck case during short-period (d-f, from 12 Jul 2013 to 18 Jul 2013), and range-spike misclassification case (g-i, 12 Jun 2016 to 14 Jun 2016). The figures represent TALOD, KHOA, and SELENE results, respectively. The SELENE results were performed using a spike threshold ( $\sigma$ ) of 1.0, a window size of 36, a polynomial fitting degree of 3, a valid data range of  $-2.0$  to  $2.0$ , and a maximum of 30 iterations.
